# Supplementary material
Source: PubMed Central journal article supplement (PMC5283163)

## Supplementary Data

**Table S1**

SGCE coding-region sequence variants (SVs) in each exon (nonsynonymous, frameshift, nonsense)

| Exon                  | Nucleotide<br>(NM_001099401.1)<br>ENST00000445866 | Protein<br>(NP_001092871.1) | SV in ExAC<br>database | Average alleles<br>checked | Variant/AA<br>ratio<br>(adjusted)* |
|-----------------------|---------------------------------------------------|-----------------------------|------------------------|----------------------------|------------------------------------|
| 1                     | 112-220                                           | 1-36                        | 17                     | 116008                     | 0.47                               |
| 2                     | 221-343                                           | 37-77                       | 17                     | 120876                     | 0.40                               |
| 3                     | 344-501                                           | 78-130                      | 12                     | 115661                     | 0.23                               |
| 4                     | 502-574                                           | 131-154                     | 14                     | 113264                     | 0.60                               |
| 5                     | 575-773                                           | 155-220                     | 20                     | 120841                     | 0.29                               |
| 6                     | 774-936                                           | 221-275                     | 15                     | 115108                     | 0.27                               |
| 7                     | 937-1148                                          | 276-345                     | 25                     | 114536                     | 0.36                               |
| 8                     | 1149-1175                                         | 346-354                     | 4                      | 120635                     | 0.43                               |
| 9                     | 1176-1364                                         | 355-417                     | 17                     | 121264                     | 0.26                               |
| 10                    | 1365-1439                                         | 418-442                     | 2                      | 110                        | 0.08**                             |
| 11                    | 1440-1483                                         | 443-457                     | 3                      | 121055                     | 0.19                               |
| 12                    | 1484-1497                                         | 458-462                     | 2                      | 121380                     | 0.38                               |
| <b>Brain specific</b> | <b>NM_001099400.1</b>                             | <b>NP_001092870.1</b>       |                        |                            |                                    |
| 11b                   | 1382-1416                                         | 424-435                     | 1                      | 23032                      | 0.08**                             |
| 12b                   | 1417-1464                                         | 436-451                     | 4                      | 121369                     | 0.24                               |

\*Adjusted relative to the 116008 alleles that included exon 1. \*\*Not adjusted due to small sample size.

**Table S2**  
Primers for genotyping, QRT-PCR, and Sanger sequencing

| Primer              | Sequence (5'→3')       | Locus                      | Usage                     | Product (bp)            |
|---------------------|------------------------|----------------------------|---------------------------|-------------------------|
| <b>Sgce_Int_G1F</b> | atgggctcgtccatgtgta    | NC_000072 4684570 - 551    | mouse genotyping          |                         |
| <b>Sgce_Int_G1R</b> | gccccagacattttcctgta   | NC_000072 4684019 - 037    | mouse genotyping          | 552 (with Sgce_Int_G1F) |
| <b>Sgce_KO_V2L</b>  | gttcgctctcgtctctgtt    | Gene trap vector           | mouse genotyping          | 393 (with Sgce_Int_G1R) |
| <b>Sgce_Q85F</b>    | gggtgaattccaccttatcc   | NM_001130189 320 - 340     | QRT-PCR                   |                         |
| <b>Sgce_Q85R</b>    | actgtacggggtcctttgg    | NM_001130189 446 - 428     | QRT-PCR for all isoforms  | 127 (with Sgce_Q85F)    |
| <b>Sgce_Q98F</b>    | tcccatgcacacagacaact   | NM_001130189 1286 - 1305   | QRT-PCR                   |                         |
| <b>Sgce_Q98R</b>    | gggatctgagctcgtgtgg    | NM_001130189 1369 - 1350   | QRT-PCR for long isoforms | 84 (with Sgce_Q98F)     |
| <b>Sgce_E9F</b>     | ttcgagacatgtccaaaaaca  | NM_001130189 1201 - 1221   | QRT-PCR                   |                         |
| <b>Sgce_E11bR</b>   | agttgtcaaacgaaaatctctg | NM_001130189 1406 - 1384   | brain-specific isoform    | 206 (with Sgce_E9F)     |
| <b>β_Gal_R1</b>     | gttgaccacagatgaaacg    | Gep-SD5 Vector 1214 - 1195 | fusion transcript         | 716 (with Sgce_E9F)     |
| <b>β_Gal_R2</b>     | ggcgattaagtgggtaacg    | Gep-SD5 Vector 828 - 809   | fusion transcript         | 329 (with Sgce_E9F)     |
| <b>Nr4a3_Q52F</b>   | cagtgtcgggatggttaagg   | NM_015743 1653 - 1672      | QRT-PCR                   |                         |
| <b>Nr4a3_Q52R</b>   | tagtgggctctttggttgg    | NM_015743 1740 - 1621      | QRT-PCR                   | 88 (with Nr4a3_Q52F)    |
| <b>Dusp1_Q17F</b>   | gtgcctgacagtgcagaatc   | NM_013642 606 - 625        | QRT-PCR                   |                         |
| <b>Dusp1_Q17R</b>   | cactgcccagggtacaggaag  | NM_013642 705 - 686        | QRT-PCR                   | 100 (with Dusp1_Q17F)   |
| <b>Cdkn1a_Q21F</b>  | tccacagcgatatccagaca   | NM_007669 67 - 86          | QRT-PCR                   |                         |
| <b>Cdkn1a_Q21R</b>  | ggacatcaccaggattggac   | NM_007669 126 - 107        | QRT-PCR                   | 60 (with Cdkn1a_Q21F)   |
| <b>Eomes_Q9F</b>    | accggcaccaaactgaga     | NM_010136 1319 - 1336      | QRT-PCR                   |                         |
| <b>Eomes_Q9R</b>    | aagctcaagaaggaacatcgc  | NM_010136 1382 - 1361      | QRT-PCR                   | 64 (with Eomes_Q9F)     |
| <b>Spry4_Q17F</b>   | gtggagcgtgctgtgac      | NM_011898 65 - 83          | QRT-PCR                   |                         |
| <b>Spry4_Q17R</b>   | caccaaggacaggcttcta    | NM_011898 125 - 106        | QRT-PCR                   | 61 (with Spry4_Q17F)    |
| <b>Slc41a3_Q5F</b>  | gccctcatgagcagtttctt   | NM_027868 871 - 890        | QRT-PCR                   |                         |
| <b>Slc41a3_Q5R</b>  | gaccagagcgtcagataacc   | NM_027868 930 - 911        | QRT-PCR                   | 60 (with Slc41a3_Q5F)   |
| <b>S100a13_Q17F</b> | ttagctgcatcccactctct   | NM_009113 268 - 287        | QRT-PCR                   |                         |
| <b>S100a13_Q17R</b> | tgctgcatcagtataccaaa   | NM_009113 342 - 322        | QRT-PCR                   | 75 (with S100a13_Q17F)  |
| <b>Socs2_Q60F</b>   | cgcgagctcagtcaaaca     | NM_007706 583 - 600        | QRT-PCR                   |                         |
| <b>Socs2_Q60R</b>   | agttcctctggagcctcttt   | NM_007706 669 - 648        | QRT-PCR                   | 87 (with Socs2_Q60F)    |
| <b>Capza2_Q12F</b>  | agccatcagttcaagcaaaa   | NM_007604 502 - 522        | QRT-PCR                   |                         |
| <b>Capza2_Q12R</b>  | aatgccaaccacctgtgtg    | NM_007604 597 - 579        | QRT-PCR                   | 96 (with Capza2_Q12F)   |
| <b>Mios_Q9F</b>     | cagagtggcattcgcttga    | NM_145374 2129 - 2148      | QRT-PCR                   |                         |
| <b>Mios_Q9R</b>     | tcatttcattggtcagctttc  | NM_145374 2205 - 2184      | QRT-PCR                   | 77 (with Mios_Q9F)      |
| <b>Ica1_Q48F</b>    | aagcaatcgtgctctatcaaaa | NM_010492 710 - 731        | QRT-PCR                   |                         |
| <b>Ica1_Q48R</b>    | ggaagccttgagatcgaaga   | NM_010492 796 - 777        | QRT-PCR                   | 87 (with Ica1_Q48F)     |
| <b>Nr4a2_Q64F</b>   | tcagagcccacgtcgatt     | NM_013613 1551 - 1568      | QRT-PCR                   |                         |
| <b>Nr4a2_Q64R</b>   | tagtcagggtttgcctggaa   | NM_013613 1623 - 1604      | QRT-PCR                   | 73 (with Nr4a2_Q64F)    |
| <b>Pomt2_Q60F</b>   | tggagacctcagccttcac    | NM_153415 1279 - 1298      | QRT-PCR                   |                         |
| <b>Pomt2_Q60R</b>   | cacaggatgcgagcagttag   | NM_153415 1338 - 1319      | QRT-PCR                   | 60 (with Pomt2_Q60F)    |
| <b>Sgca_Q66F</b>    | catcgaggctcacagcctaca  | NM_009161 559 - 578        | QRT-PCR                   |                         |
| <b>Sgca_Q66R</b>    | aactcagcttggtatggcaac  | NM_009161 666 - 646        | QRT-PCR                   | 108 (with Sgca_Q66F)    |
| <b>Sgcb_Q11F</b>    | tggtcatcactggcaacaac   | NM_011890 428 - 447        | QRT-PCR                   |                         |
| <b>Sgcb_Q11R</b>    | caacactcagcttggtcgtc   | NM_011890 490 - 471        | QRT-PCR                   | 63 (with Sgcb_Q11F)     |

**Table S3**

Expression of *Sgce* in one-month-old gene-trap mice. Primers 1 (85F/85R), all isoforms. Primers 2 (98F/98R), long isoforms. Primers 3 (E9F/E11bR), brain-specific isoform. Primers 4 (E9F/ $\beta$ -gal\_R2), *Sgce/lacZ* fusion transcript. QRT-PCR values are referenced to wild-type (*Sgce*<sup>+/+</sup>) cerebral cortex and presented as means  $\pm$  SEM (n = 3 mice/genotype). *Sgce*<sup>m+/pGt</sup>, *Sgce*<sup>mGt/p+</sup>, and *Sgce*<sup>mGt/pGt</sup> indicate paternal heterozygotes, maternal heterozygotes, and homozygotes, respectively.

| Genotype                       | Cerebral cortex |                 |                 |                 |                 | Cerebellum      |                 |                 |                 |                 |
|--------------------------------|-----------------|-----------------|-----------------|-----------------|-----------------|-----------------|-----------------|-----------------|-----------------|-----------------|
|                                | Primers 1       | Primers 2       | Primers 3       | Primers 4       |                 | Primers 1       | Primers 2       | Primers 3       | Primers 4       |                 |
|                                |                 |                 |                 | Random          | Oligo(dT)       |                 |                 |                 | Random          | Oligo(dT)       |
| <i>Sgce</i> <sup>+/+</sup>     | 1.00 $\pm$ 0.05 | 1.00 $\pm$ 0.09 | 1.00 $\pm$ 0.06 | 0.00 $\pm$ 0.00 | 0.00 $\pm$ 0.00 | 1.86 $\pm$ 0.09 | 1.21 $\pm$ 0.08 | 0.94 $\pm$ 0.05 | 0.00 $\pm$ 0.00 | 0.00 $\pm$ 0.00 |
| <i>Sgce</i> <sup>m+/pGt</sup>  | 0.31 $\pm$ 0.02 | 0.00 $\pm$ 0.00 | 0.00 $\pm$ 0.00 | 0.18 $\pm$ 0.03 | 0.09 $\pm$ 0.01 | 0.57 $\pm$ 0.04 | 0.00 $\pm$ 0.00 | 0.00 $\pm$ 0.00 | 0.30 $\pm$ 0.08 | 0.16 $\pm$ 0.03 |
| <i>Sgce</i> <sup>mGt/p+</sup>  | 0.99 $\pm$ 0.03 | 0.98 $\pm$ 0.03 | 0.94 $\pm$ 0.02 | 0.00 $\pm$ 0.00 | 0.00 $\pm$ 0.00 | 1.83 $\pm$ 0.08 | 1.18 $\pm$ 0.06 | 0.97 $\pm$ 0.04 | 0.00 $\pm$ 0.00 | 0.00 $\pm$ 0.00 |
| <i>Sgce</i> <sup>mGt/pGt</sup> | 0.29 $\pm$ 0.03 | 0.00 $\pm$ 0.00 | 0.00 $\pm$ 0.00 | 0.15 $\pm$ 0.03 | 0.08 $\pm$ 0.01 | 0.54 $\pm$ 0.03 | 0.00 $\pm$ 0.00 | 0.00 $\pm$ 0.00 | 0.28 $\pm$ 0.06 | 0.15 $\pm$ 0.03 |

**Table S4**

Rating scale for abnormal movements

| <b>Abnormal Movement</b>          | <b>Scoring</b>   |
|-----------------------------------|------------------|
| Face - All Abnormal Movements     | 0, 1, 2, 3, or 4 |
| Face Tonus                        | 0 or 1           |
| Face Clonus                       | 0 or 1           |
| Face Tremor                       | 0 or 1           |
| Neck - All Abnormal Movements     | 0, 1, 2, 3, or 4 |
| Neck Tremor                       | 0 or 1           |
| Neck Twisting                     | 0 or 1           |
| Neck Bobbing                      | 0 or 1           |
| Neck Wagging                      | 0 or 1           |
| Neck Sustained Extension          | 0 or 1           |
| Neck Sustained Flexion            | 0 or 1           |
| Trunk - All abnormal movements    | 0, 1, 2, 3, or 4 |
| Trunk Tremor                      | 0 or 1           |
| Trunk Twisting                    | 0 or 1           |
| Trunk Sustained Extension         | 0 or 1           |
| Trunk Sustained Flexion           | 0 or 1           |
| Forelimb - All Abnormal Movements | 0, 1, 2, 3, or 4 |
| Forelimb Tremor                   | 0 or 1           |
| Forelimb Twisting                 | 0 or 1           |
| Forelimb Clonus                   | 0 or 1           |
| Forelimb Sustained Extension      | 0 or 1           |
| Forelimb Sustained Flexion        | 0 or 1           |
| Hindlimb - All Abnormal Movements | 0, 1, 2, 3, or 4 |
| Hindlimb Tremor                   | 0 or 1           |
| Hindlimb Twisting                 | 0 or 1           |
| Hindlimb Clonus                   | 0 or 1           |
| Hindlimb Sustained Extension      | 0 or 1           |
| Hindlimb Sustained Flexion        | 0 or 1           |

Definitions: wagging - head moving repeatedly from side to side, bobbing - head moving repeatedly up and down, clonus - repeated rhythmic abnormal movements, tonus - sustained abnormal movement/posture involving muscle contractions (i.e., a hindlimb extended caudally because the animal was too weak to pull it back would not be considered tonus)

**Table S5**

Spectral counts and protein coverage for sarcoglycan (SG) peptides in immunoaffinity purifications of  $\epsilon$ -SG from whole brain of wild-type and *Sgce*<sup>m+/pGt</sup> mice. Complexes containing  $\epsilon$ -SG were captured using esg3788 (all  $\epsilon$ -SG isoforms) and esg2-1358 ( $\epsilon$ -SG “brain-specific”) antibodies. Eluted proteins were analyzed via mass spectrometry. Spectral counts for each SG and the percent of the SG protein covered by peptides identified in the mass spectrometry analysis are provided for each immunoaffinity purification (IAP).

| Protein        | UniProt accession number | esg3788 IAP    |                  |                               |                  | esg2-1358 IAP  |                  |                               |                  |
|----------------|--------------------------|----------------|------------------|-------------------------------|------------------|----------------|------------------|-------------------------------|------------------|
|                |                          | Wild-type      |                  | <i>Sgce</i> <sup>m+/pGt</sup> |                  | Wild-type      |                  | <i>Sgce</i> <sup>m+/pGt</sup> |                  |
|                |                          | Spectral count | Protein coverage | Spectral count                | Protein coverage | Spectral count | Protein coverage | Spectral count                | Protein coverage |
| $\epsilon$ -SG | O70258                   | 9              | 16.16%           | 1                             | 2.54%            | 2              | 5.08%            | 0                             | 0.00%            |
| $\beta$ -SG    | P82349                   | 17             | 30.31%           | 2                             | 11.56%           | 8              | 23.44%           | 0                             | 0.00%            |
| $\delta$ -SG   | P82347                   | 13             | 33.22%           | 5                             | 26.56%           | 8              | 26.99%           | 0                             | 0.00%            |
| $\zeta$ -SG    | Q8BX51                   | 8              | 29.90%           | 2                             | 8.72%            | 10             | 39.23%           | 0                             | 0.00%            |

**Table S6**

Biogenic monoamines in 3-month old wild-type (WT) and *Sgce*<sup>m+/pGt</sup> mice. Values are means (ng/mg protein) ± SEM. DOPAC, 3,4-dihydroxyphenylacetic acid; DA, dopamine; 5-HIAA, 5-hydroxyindoleacetic acid; HVA, homovanillic acid; 5-HT, 5-hydroxytryptophan; 3-MT, 3-methoxytyramine. There were no significant effects of genotype.

| Gender,<br>Genotypes<br>(numbers)      | Noradrenaline | DOPAC      | DA           | 5-HIAA    | HVA        | 5-HT       | 3-MT       |
|----------------------------------------|---------------|------------|--------------|-----------|------------|------------|------------|
| M, WT (n=3)                            | 0.98±0.11     | 16.37±0.57 | 115.30±8.45  | 5.31±0.25 | 14.74±0.35 | 7.46±0.65  | 11.70±0.63 |
| M, <i>Sgce</i> <sup>m+/pGt</sup> (n=3) | 1.32±0.49     | 15.95±2.97 | 121.81±3.34  | 7.84±2.52 | 18.96±3.24 | 8.94±1.56  | 11.94±1.39 |
| F, WT (n=3)                            | 0.87±0.15     | 16.22±1.18 | 134.47±6.63  | 6.75±0.38 | 17.94±0.22 | 8.40±0.60  | 12.48±1.55 |
| F, <i>Sgce</i> <sup>m+/pGt</sup> (n=3) | 2.63±1.15     | 12.96±2.34 | 102.36±23.14 | 6.69±0.39 | 12.73±2.47 | 11.23±2.41 | 9.66±1.70  |

**Table S7**

Expression of genes that contribute to the dystrophin-glycoprotein complex. \*Raw expression value in cerebellum as reported by BioGPS (biogps.org, maximum value chosen if multiple probesets existed). \*\*Qualitative assessment of Allen Brain Atlas in situ hybridization images.

| Gene Symbol     | Description                                                                        | Average intensity values |                        | Fold change | p value | BioGPS  | Allen Brain Atlas**    |
|-----------------|------------------------------------------------------------------------------------|--------------------------|------------------------|-------------|---------|---------|------------------------|
|                 |                                                                                    | Wild-type                | Sgce <sup>m+/pGt</sup> |             |         | Level*  | Cerebellum             |
| <i>Agrin</i>    | Agtrin proteoglycan                                                                | 266.8±7.9                | 261.8±4.8              | -1.02       | 0.603   | 267.8   | All neurons            |
| <i>Alg14</i>    | Asparagine-linked glycosylation 14 homolog (yeast)                                 | 428.2±13.0               | 440.9±8.1              | 1.03        | 0.428   | 126.3   | All neurons            |
| <i>Alg2</i>     | Asparagine-linked glycosylation 2 homolog (yeast, alpha-1,3-mannosyltransferase)   | 852.2±10.7               | 883.6± 8.1             | 1.04        | 0.041   | 1225.1  | All neurons            |
| <i>Ank2</i>     | Ankyrin 2, brain                                                                   | 3438.3±34.6              | 3336.2±36.1            | -1.03       | 0.068   | 11768.5 | High in Purkinje cells |
| <i>Arhgef9</i>  | CDC42 guanine nucleotide exchange factor (GEF) 9                                   | 1620.0±10.5              | 1548.4±27.0            | -1.04       | 0.033   | 371.5   | High in Purkinje cells |
| <i>B3Galnt2</i> | UDP-GalNAc:betaGlcNAc beta 1,3-galactosaminyltransferase, polypeptide 2            | 311.9± 5.1               | 315.0±11.1             | 1.01        | 0.806   | 138.6   | High in Purkinje cells |
| <i>B3Gnt1</i>   | UDP-GlcNAc:betaGal beta-1,3-N-acetylglucosaminyltransferase 1                      | 450.3±6.1                | 435.7±7.1              | -1.03       | 0.148   | 801.7   | High in Purkinje cells |
| <i>Bgn</i>      | Biglycan                                                                           | 85.8± 2.6                | 82.2± 3.7              | -1.04       | 0.441   | 74.0    | All neurons            |
| <i>Calm1</i>    | Predicted gene 7743; calmodulin 3; calmodulin 2; calmodulin 1; predicted gene 7308 | 2760.5±47.9              | 2766.7±40.3            | 1.00        | 0.923   | 76182.8 | High in Purkinje cells |
| <i>Cav3</i>     | Caveolin 3                                                                         | 54.0±1.1                 | 62.3±3.6               | 1.15        | 0.055   | 4.6     | All neurons            |
| <i>Csk</i>      | c-src tyrosine kinase                                                              | 199.6±2.9                | 199.0±5.6              | -1.00       | 0.920   | 52.9    | All neurons            |
| <i>Dag1</i>     | Dystroglycan 1                                                                     | 719.8±10.2               | 756.4±14.0             | 1.05        | 0.061   | 785.8   | High in Purkinje cells |
| <i>Dmd</i>      | Dystrophin, muscular dystrophy                                                     | 335.3±7.5                | 331.3±6.4              | -1.01       | 0.694   | 155.8   | High in Purkinje cells |
| <i>Drp2</i>     | Dystrophin related protein 2                                                       | 313.8±4.2                | 310.9±8.8              | -1.01       | 0.773   | 52.9    | All neurons            |
| <i>Dtna</i>     | Dystrobrevin alpha                                                                 | 1772.4±30.0              | 1703.4±23.6            | -1.04       | 0.100   | 1650.2  | High in Purkinje cells |
| <i>Dtnb</i>     | Dystrobrevin, beta                                                                 | 594.8±10.7               | 578.5±11.0             | -1.03       | 0.314   | 90.1    | High in Purkinje cells |
| <i>Dtnbp1</i>   | Dystrobrevin binding protein 1                                                     | 259.7±4.7                | 261.0±5.2              | 1.01        | 0.854   | 308.6   | All neurons            |
| <i>Fkrp</i>     | Fukutin related protein                                                            | 237.4±5.9                | 240.9±6.3              | 1.01        | 0.694   | 158.8   | High in Purkinje cells |
| <i>Fktn</i>     | Fukutin                                                                            | 325.8±9.7                | 297.1±13.1             | -1.10       | 0.108   | 610.8   | High in Purkinje cells |
| <i>Fyn</i>      | Fyn proto-oncogene                                                                 | 541.6±9.0                | 518.8±10.8             | -1.04       | 0.136   | 1180.7  | High in Purkinje cells |
| <i>Gne</i>      | Glucosamine                                                                        | 392.4±8.9                | 376.0±5.1              | -1.04       | 0.141   | 97.6    | All neurons            |
| <i>Grb2</i>     | Growth factor receptor bound protein 2; predicted gene 12791                       | 544.7±13.6               | 531.4±6.7              | -1.03       | 0.398   | 706.4   | High in Purkinje cells |
| <i>Hspg2</i>    | Perlecan (heparan sulfate proteoglycan 2)                                          | 161.8±2.5                | 161.4±4.6              | 1.00        | 0.946   | 37.2    | All neurons            |
| <i>Ispd</i>     | RIKEN cDNA 4930579E17 gene                                                         | 70.3±5.0                 | 69.5±3.3               | -1.01       | 0.890   | 5.8     | All neurons            |
| <i>Lama2</i>    | Laminin, alpha 2                                                                   | 227.3±4.8                | 239.5±7.4              | 1.05        | 0.194   | 38.8    | All neurons            |
| <i>Large</i>    | Like-glycosyltransferase                                                           | 1444.4±16.1              | 1396.8±15.4            | -1.03       | 0.059   | 982.3   | High in Purkinje cells |
| <i>Mapk12</i>   | Mitogen-activated protein kinase 12                                                | 1056.8±23.1              | 990.1±38.8             | -1.07       | 0.171   | 360.8   | All neurons            |
| <i>Nck1</i>     | Non-catalytic region of tyrosine kinase adaptor protein 1                          | 540.0±8.4                | 525.9±5.8              | -1.03       | 0.200   | 564.7   | All neurons            |
| <i>NL2</i>      | Neuroigin 2                                                                        | 1199.2±18.6              | 1213.4±20.4            | 1.01        | 0.620   | 713.1   | High in Purkinje cells |
| <i>Nos3</i>     | Nitric oxide synthase 3, endothelial cell                                          | 156.2±5.1                | 160.1±3.5              | 1.02        | 0.542   | 28.7    | All neurons            |

| Gene Symbol    | Description                                                                           | Average Intensity Values |               | Fold Changes | p-value  | BioGPS Level | Allen Brain Atlas Presence in Cerebellum |
|----------------|---------------------------------------------------------------------------------------|--------------------------|---------------|--------------|----------|--------------|------------------------------------------|
|                |                                                                                       | Wild Type                | Knockout      |              |          |              |                                          |
| <i>Plec</i>    | Plectin 1                                                                             | 190.8±2.9                | 193.7±2.5     | 1.02         | 0.467    | 341.3        | High in purkinje cells                   |
| <i>Pomgnt1</i> | Protein O-linked mannose beta1,2-N-acetylglucosaminyltransferase                      | 251.6±3.2                | 250.2±4.4     | -1.01        | 0.795    | 305.5        | High in purkinje cells                   |
| <i>Pomgnt2</i> | Protein O-linked mannose beta 1,4-N-acetylglucosaminyltransferase 2                   | 183.9±4.4                | 188.6±6.3     | 1.03         | 0.552    | 115.2        | All cells                                |
| <i>Pomt1</i>   | Protein-O-mannosyltransferase 1                                                       | 215.6±6.7                | 219.8±4.9     | 1.02         | 0.629    | 83.6         | High in purkinje cells                   |
| <i>Pomt2</i>   | Protein-O-mannosyltransferase 2                                                       | 518.1±7.7                | 514.2±4.8     | -1.01        | 0.678    | 22.0         | High in purkinje cells                   |
| <i>Rapsn</i>   | Receptor-associated protein of the synapse                                            | 74.7±1.9                 | 73.1±4.3      | -1.02        | 0.733    | 4.6          | High in purkinje cells                   |
| <i>Sgca</i>    | Sarcoglycan, alpha (dystrophin-associated glycoprotein)                               | 99.4±2.0                 | 103.4±2.2     | 1.04         | 0.216    | 4.6          | All cells                                |
| <i>Sgcb</i>    | Sarcoglycan, beta (dystrophin-associated glycoprotein)                                | 531.5±15.3               | 503.2±14.5    | -1.06        | 0.209    | 545.5        | High in purkinje cells                   |
| <i>Sgcd</i>    | Sarcoglycan, delta (dystrophin-associated glycoprotein)                               | 87.8±2.5                 | 85.0±4.1      | -1.03        | 0.581    | 4.6          | All cells                                |
| <i>Sgce</i>    | Sarcoglycan, epsilon                                                                  | 627.4±7.0                | 300.5±13.3    | -2.09        | 9.13E-10 | 387.6        | All cells                                |
| <i>Sgcg</i>    | Sarcoglycan, gamma (dystrophin-associated glycoprotein)                               | 63.2±1.7                 | 62.3±2.2      | -1.01        | 0.760    | 4.6          | All cells                                |
| <i>Sgcz</i>    | Sarcoglycan zeta                                                                      | 84.7±3.6                 | 77.0±2.9      | -1.10        | 0.135    | no data      | All cells                                |
| <i>Shc1</i>    | Predicted gene 5500; src homology 2 domain-containing transforming protein C1         | 144.5±2.0                | 149.3±3.5     | 1.03         | 0.269    | 24.6         | All cells                                |
| <i>Slc35A3</i> | Solute carrier family 35 (UDP-N-acetylglucosamine (UDP-GlcNAc) transporter), member 3 | 139.1±2.1                | 136.7±2.3     | -1.02        | 0.298    | 245.2        | All cells                                |
| <i>Snap25</i>  | Synaptosomal-associated protein 25                                                    | 10901.0±122.0            | 10903.3±144.1 | 1.00         | 0.991    | 57901.7      | High in purkinje cells                   |
| <i>Snta1</i>   | Syntrophin, acidic 1                                                                  | 172.1±4.1                | 174.1±4.2     | 1.01         | 0.732    | 38.3         | All cells                                |
| <i>Sntb1</i>   | Syntrophin, basic 1                                                                   | 68.0±2.4                 | 62.2±3.6      | -1.09        | 0.215    | 7.2          | All cells                                |
| <i>Sntb2</i>   | Syntrophin, basic 2                                                                   | 264.1±5.0                | 271.1±9.3     | 1.03         | 0.519    | 39.4         | All cells                                |
| <i>Sntg1</i>   | Syntrophin, gamma 1                                                                   | 102.3±1.5                | 100.2±4.3     | -1.02        | 0.650    | 4.6          | High in purkinje cells                   |
| <i>Sntg2</i>   | Syntrophin, gamma 2                                                                   | 58.9±1.3                 | 59.0±2.0      | 1.00         | 0.981    | 5.6          | All cells                                |
| <i>Src</i>     | Rous sarcoma oncogene                                                                 | 333.9±5.6                | 349.5±5.3     | 1.05         | 0.071    | 54.0         | No data                                  |
| <i>Sspn</i>    | Sarcospan                                                                             | 62.3±1.9                 | 60.5±2.5      | -1.03        | 0.564    | 42.9         | All cells                                |
| <i>Stx1A</i>   | Syntaxin 1A (brain)                                                                   | 66.3±3.5                 | 77.0±4.2      | 1.16         | 0.082    | 19.9         | All cells                                |
| <i>Syne1</i>   | Synaptic nuclear envelope 1                                                           | 4266.7±52.6              | 4213.7±82.6   | -1.01        | 0.517    | 8329.7       | High in purkinje cells                   |
| <i>Tmem5</i>   | Transmembrane protein 5                                                               | 202.5±4.0                | 187.1±5.2     | -1.08        | 0.041    | 226.0        | High in purkinje cells                   |
| <i>Utrn</i>    | Utrophin                                                                              | 503.0±8.8                | 492.9±6.1     | -1.02        | 0.368    | 467.8        | High in purkinje cells                   |



**Table S8**  
Enriched KEGG pathways

| Regulated               | Pathway                               | No. of Genes | Enrichment <sup>a</sup> | Raw p <sup>b</sup> | Adj p value <sup>c</sup> |
|-------------------------|---------------------------------------|--------------|-------------------------|--------------------|--------------------------|
| <b>Up-Regulated</b>     |                                       |              |                         |                    |                          |
| <b>1.10 Fold Change</b> | Systemic lupus erythematosus          | 9            | 5.05                    | 7.85E-05           | 5.30E-03                 |
|                         | Ribosome                              | 7            | 5.13                    | 4.00E-04           | 8.90E-03                 |
|                         | Osteoclast differentiation            | 8            | 4.80                    | 3.00E-04           | 8.90E-03                 |
|                         | Primary bile acid biosynthesis        | 3            | 13.92                   | 1.20E-03           | 2.01E-02                 |
|                         | Circadian rhythm - mammal             | 3            | 9.49                    | 3.70E-03           | 4.13E-02                 |
|                         | RIG-I-like receptor signaling pathway | 5            | 5.04                    | 3.20E-03           | 4.13E-02                 |
|                         | Cytosolic DNA-sensing pathway         | 4            | 5.06                    | 8.00E-03           | 7.66E-02                 |
|                         | Toll-like receptor signaling pathway  | 5            | 3.45                    | 1.54E-02           | 1.23E-01                 |
|                         | Adipocytokine signaling pathway       | 4            | 4.09                    | 1.66E-02           | 1.23E-01                 |
|                         | Apoptosis                             | 4            | 3.35                    | 3.18E-02           | 2.13E-01                 |
| <b>1.15 Fold Change</b> | Vitamin digestion and absorption      | 2            | 14.44                   | 8.40E-03           | 4.51E-02                 |
|                         | Osteoclast differentiation            | 4            | 5.97                    | 4.60E-03           | 4.51E-02                 |
|                         | Antigen processing and presentation   | 3            | 6.93                    | 9.40E-03           | 4.51E-02                 |
|                         | Systemic lupus erythematosus          | 4            | 5.59                    | 5.80E-03           | 4.51E-02                 |
|                         | Primary bile acid biosynthesis        | 2            | 23.10                   | 3.30E-03           | 4.51E-02                 |
|                         | Ribosome                              | 3            | 5.47                    | 1.77E-02           | 7.08E-02                 |
|                         | Toll-like receptor signaling pathway  | 3            | 5.15                    | 2.08E-02           | 7.13E-02                 |
|                         | Lysosome                              | 3            | 4.23                    | 3.45E-02           | 1.00E-01                 |
|                         | mTOR signaling pathway                | 2            | 6.54                    | 3.76E-02           | 1.00E-01                 |
|                         | Hepatitis C                           | 3            | 3.79                    | 4.51E-02           | 1.08E-01                 |
| <b>1.20 Fold Change</b> | mTOR signaling pathway                | 2            | 14.63                   | 8.30E-03           | 2.90E-02                 |
|                         | Osteoclast differentiation            | 3            | 10.03                   | 3.40E-03           | 2.90E-02                 |
|                         | Jak-STAT signaling pathway            | 3            | 7.75                    | 6.90E-03           | 2.90E-02                 |
|                         | Hepatitis C                           | 3            | 8.49                    | 5.40E-03           | 2.90E-02                 |
|                         | ErbB signaling pathway                | 2            | 8.91                    | 2.13E-02           | 5.96E-02                 |
|                         | Toll-like receptor signaling pathway  | 2            | 7.68                    | 2.81E-02           | 6.28E-02                 |
|                         | MAPK signaling pathway                | 3            | 4.37                    | 3.14E-02           | 6.28E-02                 |
|                         | Systemic lupus erythematosus          | 2            | 6.25                    | 4.08E-02           | 6.35E-02                 |
|                         | Lysosome                              | 2            | 6.30                    | 4.02E-02           | 6.35E-02                 |
|                         | Protein processing in endoplasmic     | 2            | 4.67                    | 6.85E-02           | 9.59E-02                 |
| <b>Down-Regulated</b>   |                                       |              |                         |                    |                          |
| <b>1.10 Fold Change</b> | B cell receptor signaling pathway     | 3            | 3.96                    | 4.04E-02           | 2.52E-01                 |
|                         | T cell receptor signaling pathway     | 4            | 3.65                    | 2.44E-02           | 2.52E-01                 |
|                         | African trypanosomiasis               | 2            | 6.30                    | 3.99E-02           | 2.52E-01                 |
|                         | Mucin type O-Glycan biosynthesis      | 2            | 7.82                    | 2.68E-02           | 2.52E-01                 |
|                         | Axon guidance                         | 3            | 2.29                    | 1.44E-01           | 5.18E-01                 |
|                         | Focal adhesion                        | 4            | 1.96                    | 1.48E-01           | 5.18E-01                 |
|                         | Long-term potentiation                | 2            | 2.92                    | 1.50E-01           | 5.18E-01                 |
|                         | Insulin signaling pathway             | 3            | 2.14                    | 1.65E-01           | 5.18E-01                 |
|                         | Apoptosis                             | 2            | 2.35                    | 2.08E-01           | 5.50E-01                 |
|                         | Small cell lung cancer                | 2            | 2.27                    | 2.20E-01           | 5.50E-01                 |
| <b>1.15 Fold Change</b> | Toll-like receptor signaling pathway  | 2            | 6.72                    | 3.59E-02           | 1.07E-01                 |
|                         | Jak-STAT signaling pathway            | 2            | 4.52                    | 7.25E-02           | 1.08E-01                 |
|                         | Metabolic pathways                    | 2            | 0.58                    | 1.00E-00           | 1.00E-00                 |
| <b>1.20 Fold Change</b> | None                                  |              |                         |                    |                          |

<sup>a</sup>Enrichment relative to number of reference genes in the genome based on the hypergeometric test. <sup>b</sup>Hypergeometric test based. <sup>c</sup>Benjamini & Hochberg multiple test correction.

**Table S9****IPA top up- and down-regulated biological functions and canonical pathways**

| <b>Top Biological Functions</b>                      |                                                                                        | <b>P value<sup>a</sup></b> | <b>No. of Molecules</b>  |
|------------------------------------------------------|----------------------------------------------------------------------------------------|----------------------------|--------------------------|
| <b>Up-Regulated</b>                                  |                                                                                        |                            |                          |
| <b>Molecular and Cellular Functions</b>              |                                                                                        |                            |                          |
|                                                      | Cell Cycle                                                                             | 2.28E-02 – 2.22E-07        | 10                       |
|                                                      | Cellular Development                                                                   | 2.31E-02 – 2.22E-07        | 32                       |
|                                                      | Cell Death and Survival                                                                | 2.04E-02 – 1.22E-05        | 27                       |
|                                                      | DNA Replication, Recombination, and Repair                                             | 2.15E-02 – 9.98E-05        | 10                       |
|                                                      | Cell-To-Cell Signaling and Interaction                                                 | 2.42E-02 – 1.11E-04        | 18                       |
| <b>Physiological System Development and Function</b> |                                                                                        |                            |                          |
|                                                      | Embryonic Development                                                                  | 2.26E-02 – 1.22E-05        | 23                       |
|                                                      | Hematological System Development and Function                                          | 2.31E-02 – 1.11E-04        | 28                       |
|                                                      | Humoral Immune Response                                                                | 1.96E-02 – 1.11E-04        | 8                        |
|                                                      | Connective Tissue Development and Function                                             | 1.93E-02 – 1.70E-04        | 28                       |
|                                                      | Skeletal and Muscular System Development and Function                                  | 2.37E-02 – 1.70E-04        | 18                       |
| <b>Top Canonical Pathways</b>                        |                                                                                        |                            |                          |
|                                                      | Regulation of eIF4 and p70S6K Signaling                                                | 1.35E-03                   | 3.8%                     |
|                                                      | mTOR Signaling                                                                         | 4.21E-03                   | 2.9%                     |
|                                                      | Glucocorticoid Receptor Signaling                                                      | 5.07E-03                   | 2.3%                     |
|                                                      | IL-17A Signaling in Gastric Cells                                                      | 7.90E-03                   | 9.1%                     |
|                                                      | EIF2 Signaling                                                                         | 1.54E-02                   | 2.6%                     |
| <b>ID</b>                                            | <b>Associated Network Functions</b>                                                    |                            | <b>Score<sup>d</sup></b> |
| 1                                                    | Cell Cycle, Cellular Development, Cell Death and Survival                              |                            | 39                       |
| 2                                                    | Cell Cycle, Organ Morphology, Reproductive System Development and Function             |                            | 23                       |
| 3                                                    | Embryonic Development, Organismal Development, Nervous System Development and Function |                            | 23                       |
| 4                                                    | Humoral Immune Response, Protein Synthesis, Connective Tissue Development and Function |                            | 15                       |
| 5                                                    | Cancer, Cell Death and Survival, Organismal Injury and Abnormalities                   |                            | 15                       |
| <b>Down-Regulated</b>                                |                                                                                        |                            |                          |
| <b>Molecular and Cellular Functions</b>              |                                                                                        |                            |                          |
|                                                      | Protein Synthesis                                                                      | 2.33E-02 – 6.77E-04        | 4                        |
|                                                      | Cellular Development                                                                   | 4.85E-02 – 1.11E-03        | 13                       |
|                                                      | Amino Acid Metabolism                                                                  | 2.06E-02 – 2.60E-03        | 2                        |
|                                                      | Cell Death and Survival                                                                | 4.82E-02 – 2.60E-03        | 7                        |
|                                                      | Cell Morphology                                                                        | 4.08E-02 – 2.60E-03        | 7                        |
| <b>Physiological System Development and Function</b> |                                                                                        |                            |                          |
|                                                      | Connective Tissue Development and Function                                             | 4.57E-02 – 2.79E-05        | 7                        |
|                                                      | Organ Morphology                                                                       | 4.57E-02 – 2.79E-05        | 9                        |
|                                                      | Skeletal and Muscular System Development and Function                                  | 4.57E-02 – 2.79E-05        | 5                        |
|                                                      | Tissue Development                                                                     | 4.85E-02 – 2.79E-05        | 11                       |
|                                                      | Tissue Morphology                                                                      | 4.82E-02 – 2.79E-05        | 8                        |
| <b>Top Canonical Pathways</b>                        |                                                                                        |                            |                          |
|                                                      | Basal Cell Carcinoma Signaling                                                         | 7.60E-04                   | 4.3%                     |
|                                                      | Zymosterol Biosynthesis                                                                | 1.55E-02                   | 16.7%                    |
|                                                      | Mouse Embryonic Stem Cell Pluripotency                                                 | 2.48E-02                   | 2.1%                     |
|                                                      | Type I Diabetes Mellitus Signaling                                                     | 2.63E-02                   | 2.1%                     |
|                                                      | Cholesterol Biosynthesis I                                                             | 3.32E-02                   | 7.7%                     |
| <b>ID</b>                                            | <b>Associated Network Functions</b>                                                    |                            | <b>Score<sup>d</sup></b> |
| 1                                                    | Cell Cycle, Embryonic Development, Organ Development                                   |                            | 24                       |
| 2                                                    | Infectious Diseases, Respiratory Disease, Cell Death and Survival                      |                            | 22                       |
| 3                                                    | Cancer, Organismal Injury and Abnormalities, Reproductive System Disease               |                            | 15                       |
| 4                                                    | Cell Cycle, Cell Death and Survival, Reproductive System Development and Function      |                            | 2                        |
| 5                                                    | Lipid Metabolism, Small Molecule Biochemistry, Vitamin and Mineral Metabolism          |                            | 2                        |

<sup>a</sup>Fischer's exact test was used to calculate a p-value determining the probability that each biological function assigned to that data set is due to chance alone. <sup>b</sup>Fischer's exact test was used to calculate a p-value determining the probability that each canonical pathway assigned to that data set is due to chance alone. <sup>c</sup>Number of genes in a pathway that were found in our significant gene list compared to the total number of genes in that pathway. <sup>d</sup>Network score is the negative log of the p-value for the likelihood that network molecules would be found together by chance alone. A higher score indicates a greater statistical significance that molecules depicted in the network are interconnected.

**Table S10**

## Top upstream regulators

| Upstream Regulators                                 |                                                                                                   | <i>p</i> value of overlap |
|-----------------------------------------------------|---------------------------------------------------------------------------------------------------|---------------------------|
| <b><i>For Significantly Up-regulated Genes</i></b>  |                                                                                                   |                           |
| <b><i>Ifnar1</i></b>                                | Interferon (alpha, beta and omega) receptor 1                                                     | 2.43E-08                  |
| <b><i>Crem</i></b>                                  | CAMP responsive element modulator                                                                 | 7.11E-08                  |
| <b><i>Creb1</i></b>                                 | CAMP responsive element binding protein 1                                                         | 2.98E-07                  |
| <b><i>Ptger4</i></b>                                | Prostaglandin E receptor 4 (subtype EP4)                                                          | 9.78E-07                  |
| <b><i>Stat1</i></b>                                 | Signal transducer and activator Of Transcription 1                                                | 2.35E-06                  |
| <b><i>For Significantly Down-regulated Gene</i></b> |                                                                                                   |                           |
| <b><i>Tnfrsf4</i></b>                               | Tumor necrosis factor receptor superfamily, member 4                                              | 8.49E-04                  |
| <b><i>Nfe2l1</i></b>                                | Nuclear factor, erythroid 2-like 1                                                                | 1.20E-03                  |
| <b><i>Kap</i></b>                                   | Kidney androgen regulated protein                                                                 | 2.72E-03                  |
| <b><i>Smarca4</i></b>                               | SWI/SNF related, matrix associated, actin dependent regulator of chromatin, subfamily A, member 4 | 4.31E-03                  |
| <b><i>Ppard</i></b>                                 | Peroxisome proliferator-activated receptor delta                                                  | 4.98E-03                  |

The overlap *p* value calls likely upstream regulators based on significant overlap between dataset genes and known targets regulated by a transcription regulator. The overlap *p* value is calculated using Fisher's Exact Test.

481 ACTCTATAGGCTTCAGCTGGTATATGTTGAGTCAAAGCTAGAGCCTGGACCACTGATATCCTGTCTTTAACAAATTGG 560

481 TGAGATATCCGAAGTCGACCACTATAACAACCTCAGTTTTGATCTCGGACCTGGTGACTATAGGACAGAAATTGTTTAAACC 560

RsaI AluI BfaI EcoRV MseI

Human Adenovirus Type 3/5 SA

561 ACTAATCGATACCGTCGACTCGAGGCTAGAACTAGTGGATCCCCGGGCTGCAGATCTGTAGGGCGCAGTAGTCCAGGGT 640

561 TGATTAGCTATGGCAGCTGAGCTCCGATCTTGATCACCTAGGGGGCCGACGTCTAGACATCCCGCGTCATCAGGTCCCA 640

SalI BfaI BfaI DpnI SmaI PstI HhaI

XhoI SpeI BamHI MspI BglII

BstYI BstYI

Sau3AI Sau3AI

DpnI

splice site (686) AdiPCR1F

↓ S R L R T N S S R S F

641 TTCCTTGATGATGTCATACTTATCCTGTCCCTTTTTTTTCCACAGCTCGGGTTGAGGACAACTCTTCGGGCTTTTC 720

641 AAGGAACTACTACAGTATGAATAGGACAGGAAAAAAGGTGTCGAGCGCAACTCCTGTTTGAGAAGCGCCAGAAAGG 720

AdiPCR1R AluI

AdiPCR1nestF  $\beta$ -galactosidase

Q W G S T V S I S L M I C D M A D P V V L Q R R D W E

721 AGTGGGATCGACGGTATCGATAAGCTTGATGATCTGTGACATGGCGGATCCCGTCGTTTTACAGCTCGGACGGGGA 800

721 TCACCCCTAGCTGCCATAGCTATTTCGAACCTACTAGACACTGTACCCGCTAGGGCAGCAAATGTTGCAGCACTGACCCCT 800

Sau3AI HindIII DpnI NlaIII

DpnI AluI Sau3AI BamHI

BstYI

Sau3AI

DpnI

N P G V T Q L N R L A A H P P F A S W R N S E E A R T

801 AACCTGGCGTTACCCAACCTTAATCGCCTTGCAGCACATCCCCCTTTCGCCAGCTGGCGTAATAGCGAAGAGGCCCGCAC 880

801 TTGGGACCGCAATGGGTTGAATTAGCGGAACGTCGTGTAGGGGAAAGCGGTCGACCGCATTATCGTTCTCCGGGCGTG 880

MseI AluI HaeIII

**Fig. S1.** Splice site for chimeric  $\epsilon$ -SG/ $\beta$ -gal fusion protein based on known sequence of the Gep-SD5 vector.

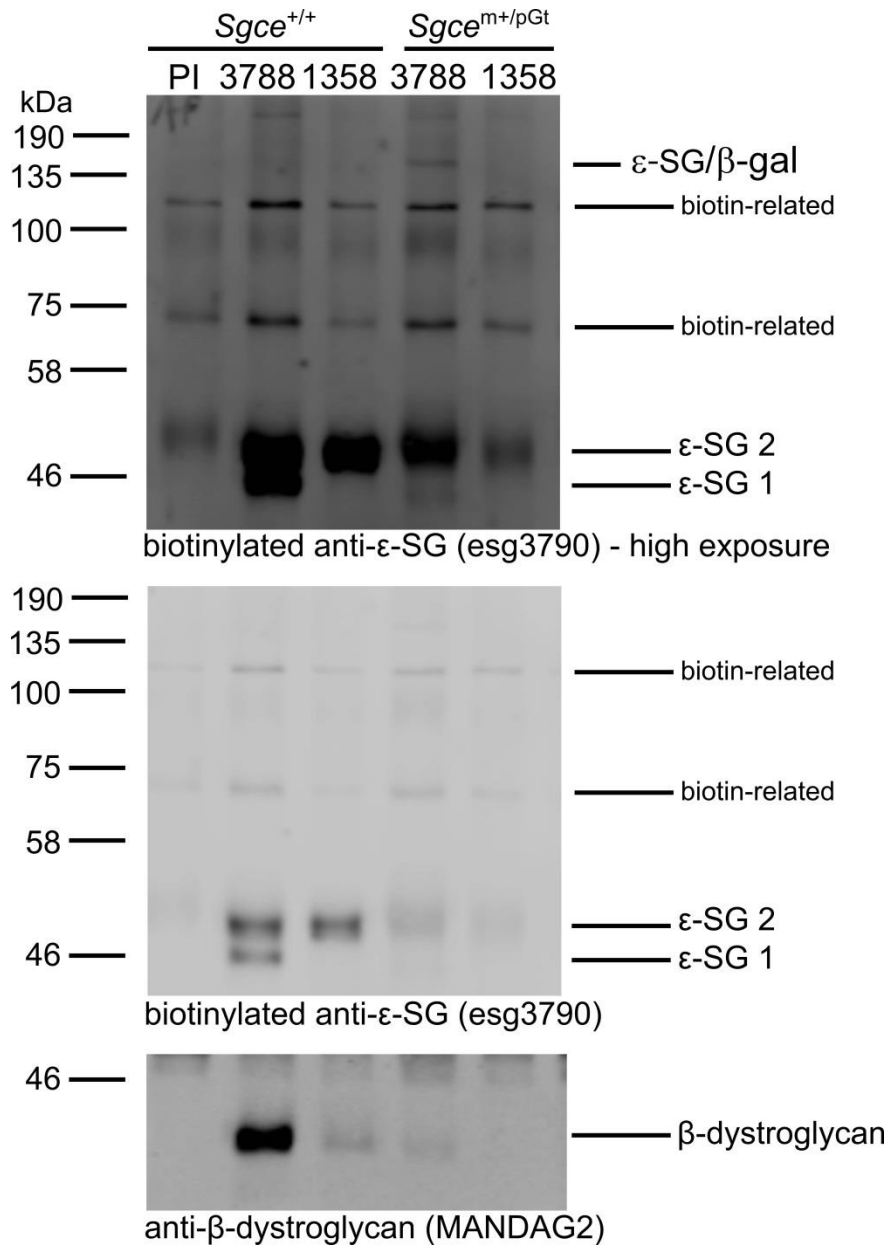

**Fig. S2.** Western blots of immunoprecipitations (IAPs) of  $\epsilon$ -SG-containing complexes from WT C57BL/6J and *Sgce*<sup>m+/pGt</sup> mice. The left three lanes contain proteins isolated from WT brain tissue whereas the right two lanes contain protein from *Sgce*<sup>m+/pGt</sup> brain tissue. Lanes are labelled with the antibody used to isolate proteins: PI, preimmune IgG; 3788, e sg3788 anti- $\epsilon$ -SG; 1358, e sg2-1358 anti- $\epsilon$ -SG brain-specific isoform. The biotinylated anti- $\epsilon$ -SG antibody detects both the major isoform (lower band,  $\epsilon$ -SG 1) and brain-specific isoform (upper bands,  $\epsilon$ -SG 2) of  $\epsilon$ -SG in IAPs using the e sg3788 anti- $\epsilon$ -SG antibody, and only the brain-specific isoform in IAPs using the e sg2-1358 anti- $\epsilon$ -SG brain-specific isoform antibody. Western blot using the anti- $\beta$ -dystroglycan antibody MANDAG2 showing co-purifications of  $\beta$ -dystroglycan in the e sg3788 and e sg-1358 IAPs from WT tissue.  $\beta$ -dystroglycan is severely reduced in the e sg3788 IAP from *Sgce*<sup>m+/pGt</sup> brain tissue and absent in the e sg-1358 IAP. With high exposure, a putative chimeric  $\epsilon$ -SG/ $\beta$ -gal band is seen at ~159 kDa.

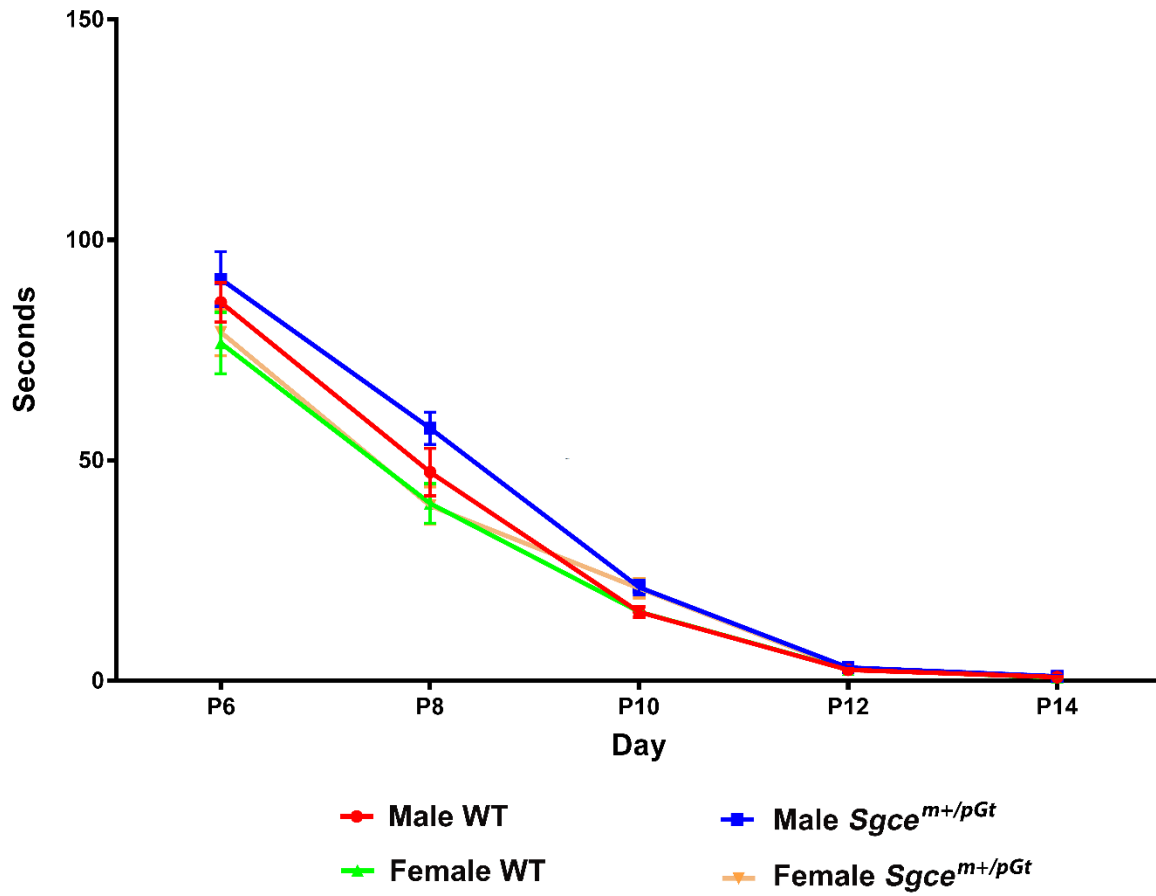

**Fig. S3.** Righting reflex for *Sgce*<sup>m+/pGt</sup> mice (n = 15 for both males and females) and wild-type (WT) littermates (n = 18 males and 16 females).

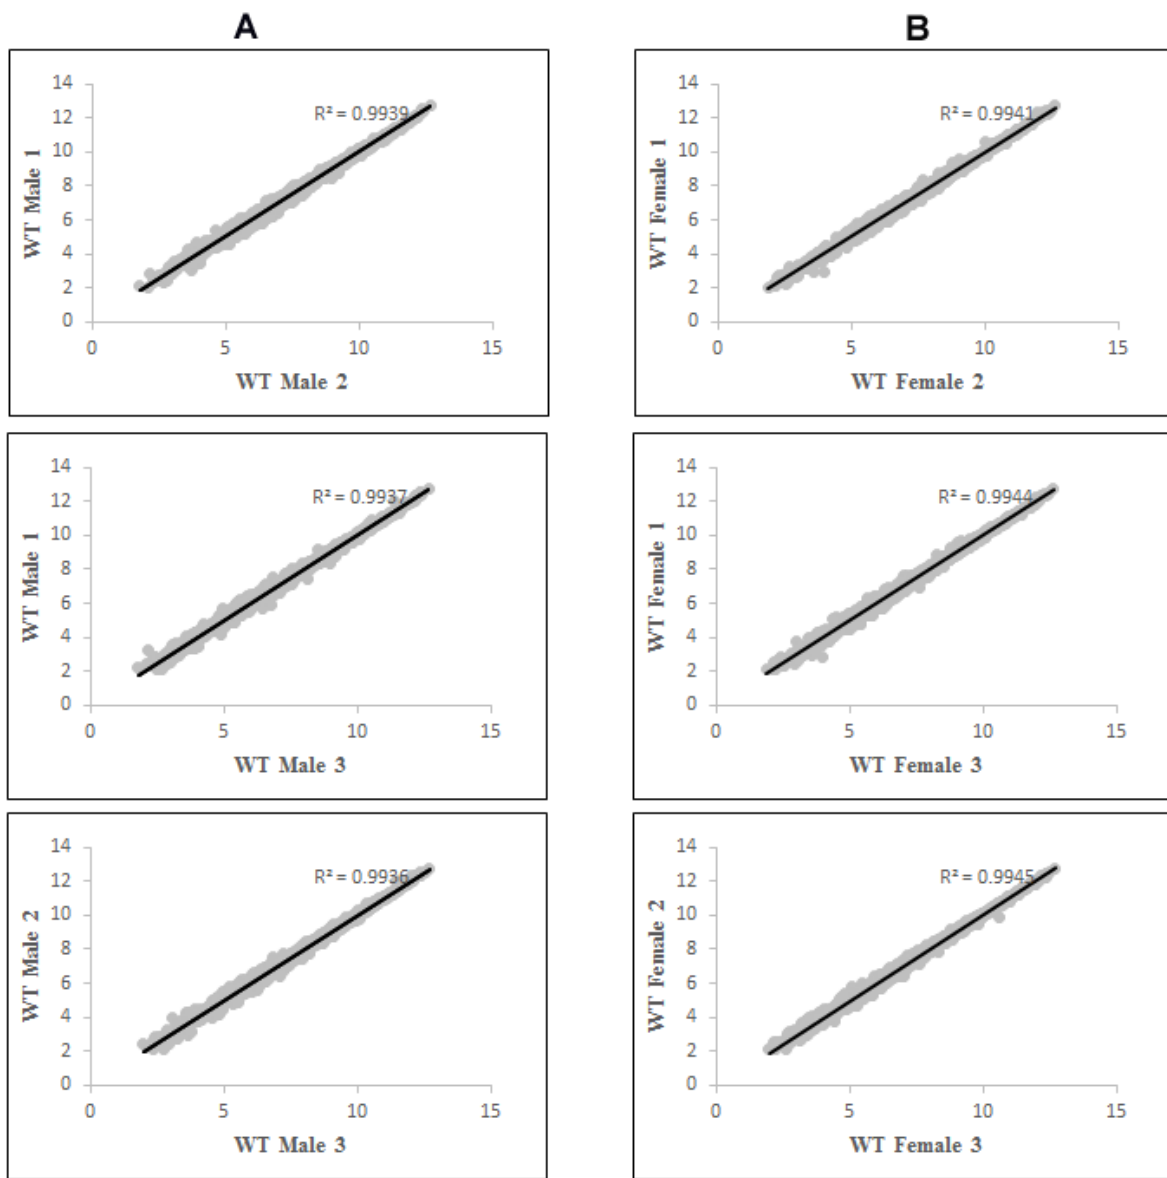

**Fig. S4.** Scatter plots of filtered and normalized expression values for 3 male (A) and 3 female (B) WT mouse gene-expression microarrays.

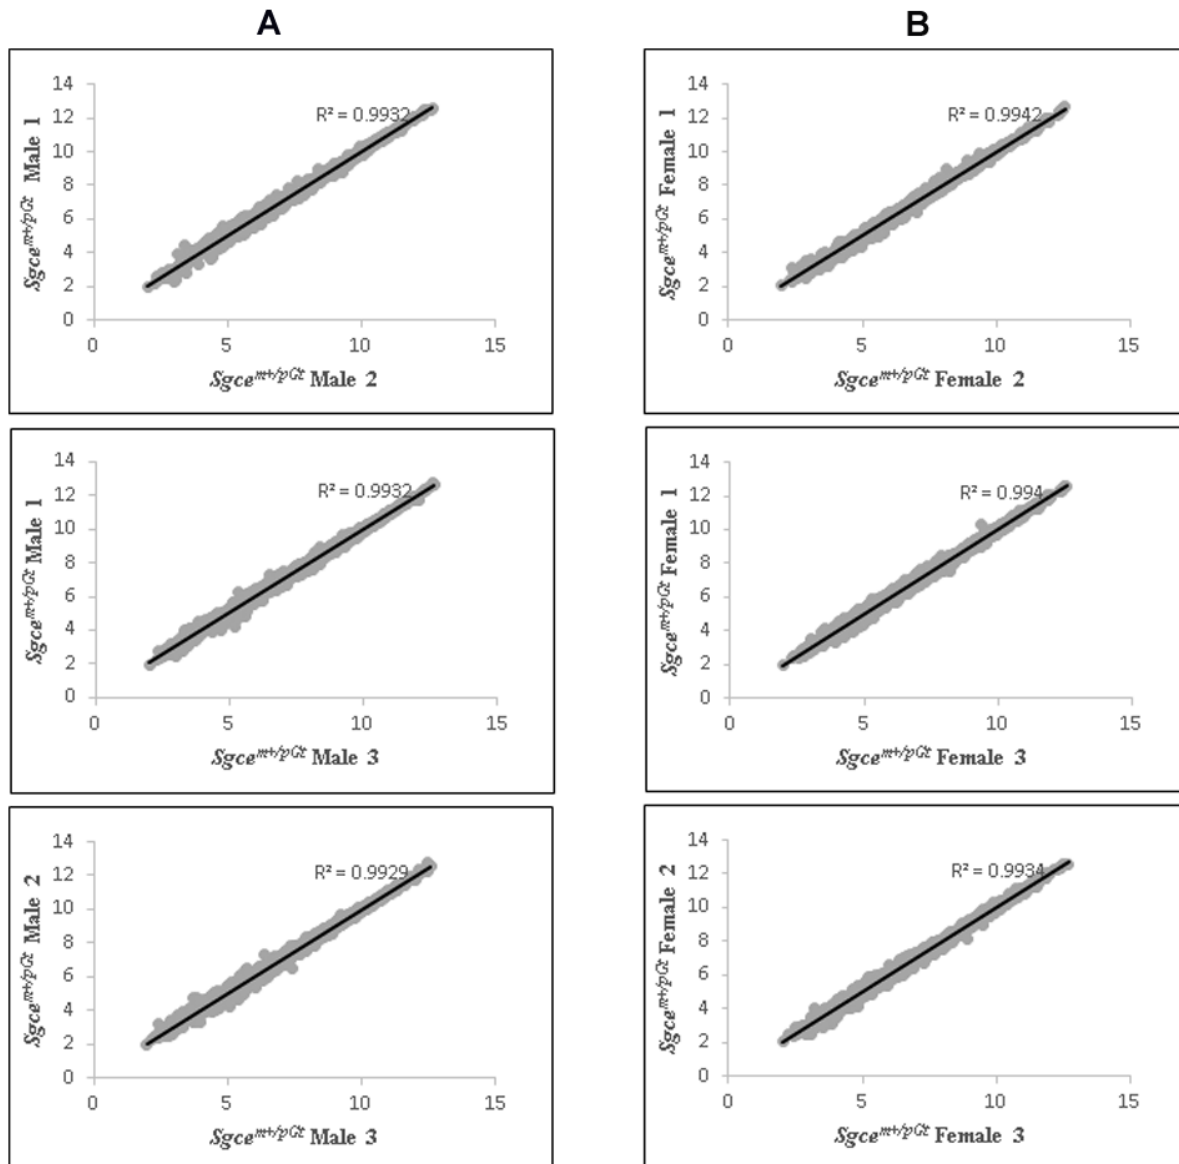

**Fig. S5.** Scatter plots of filtered and normalized expression values for 3 male (A) and 3 female (B) *Sgce*<sup>m+/pGt</sup> mouse gene-expression microarrays.



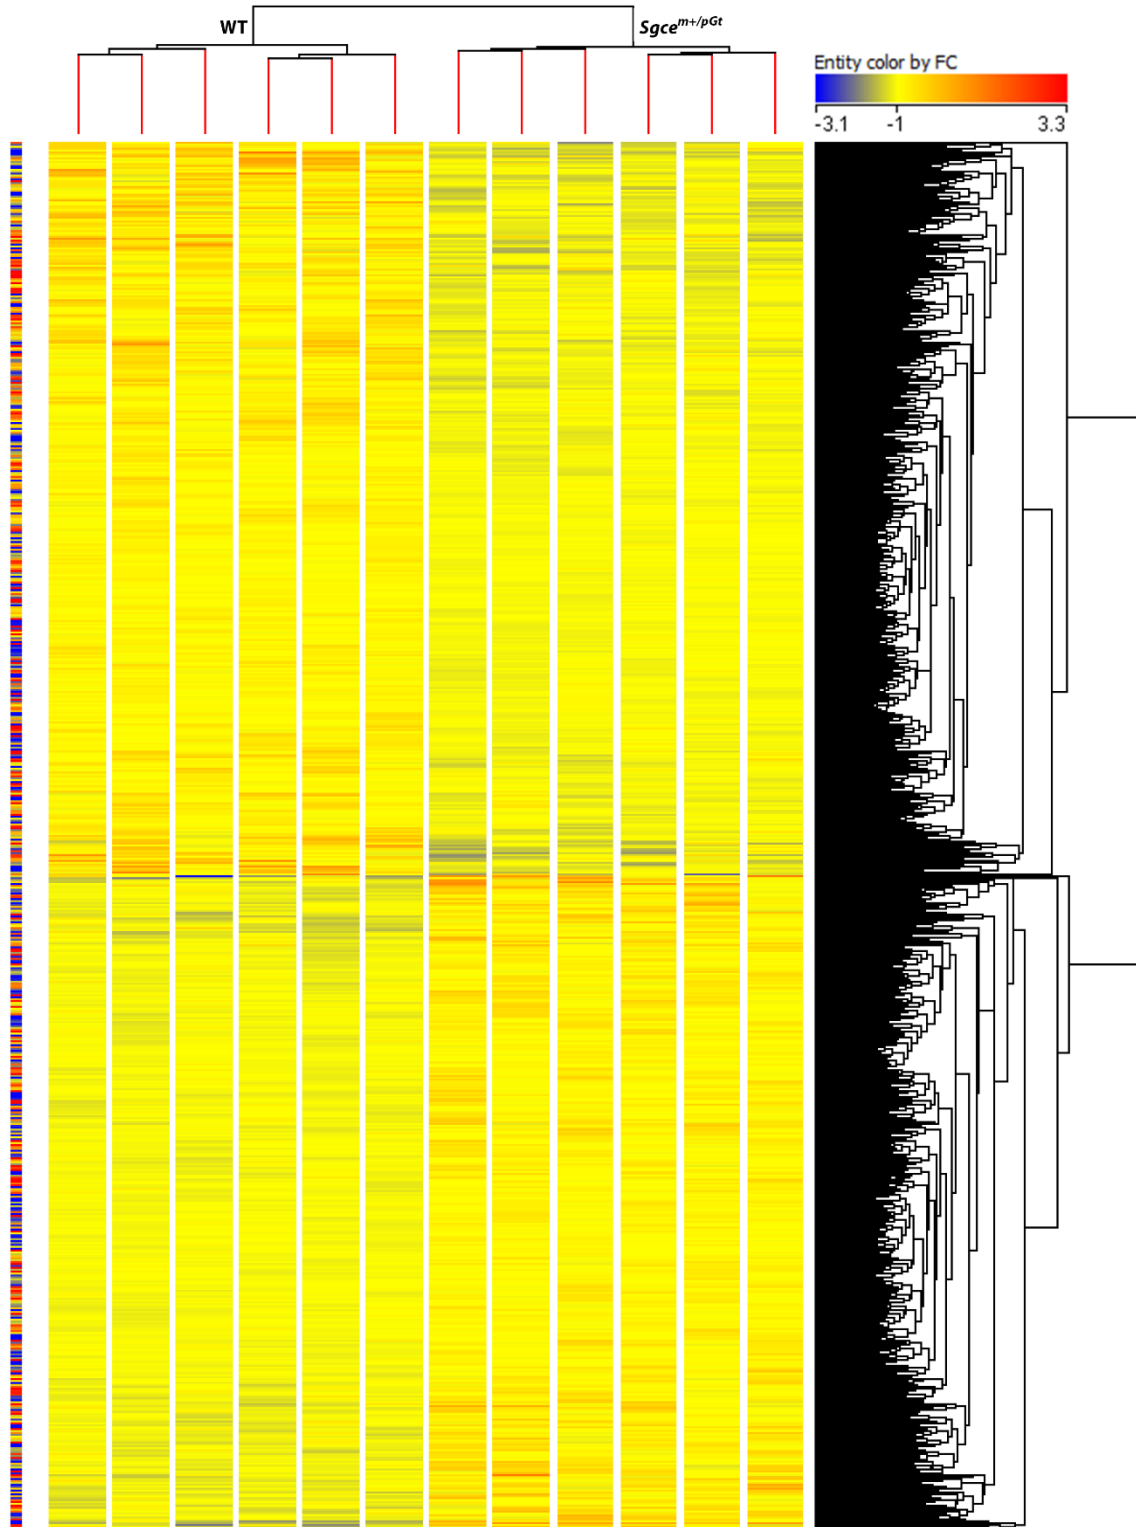

**Fig. S6.** Heat map for whole-genome gene expression analysis of *Sgce*<sup>m+/pGt</sup> and WT (*Sgce*<sup>+/+</sup>) mouse cerebellum (*Sgce*<sup>m+/pGt</sup>, 3 male and 3 female mice; *Sgce*<sup>+/+</sup>, 3 male and 3 female WT littermates).

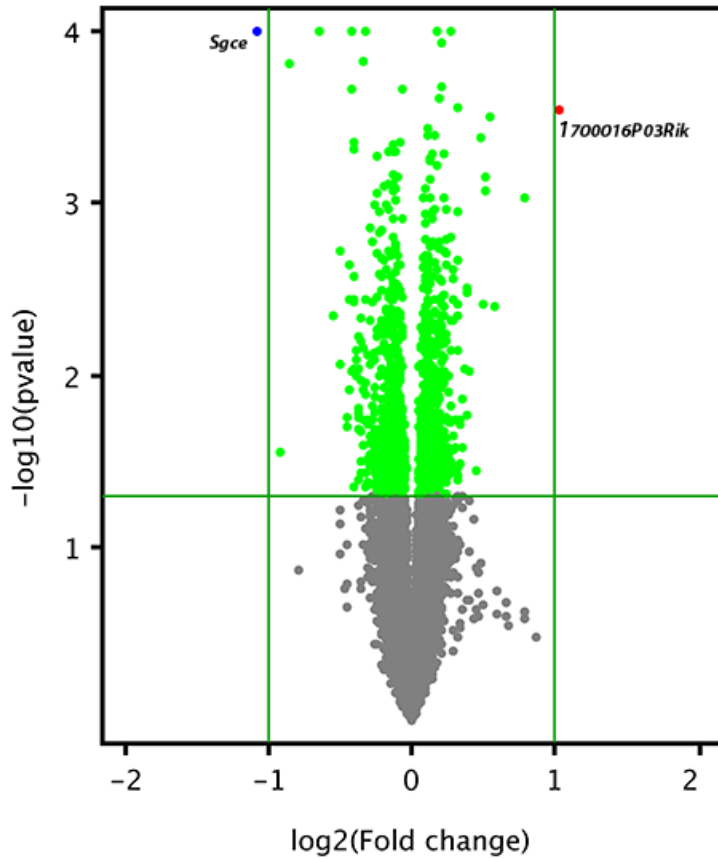

**Fig. S7.** A volcano plot for whole-genome gene expression analysis of *Sgce* gene-trap mouse cerebellum (*Sgce*<sup>m+/pGt</sup>, 3 male and 3 female mice; *Sgce*<sup>+/+</sup>, 3 male and 3 female littermates). The plot displays mean fold differences for each probe set in *Sgce*<sup>+/+</sup> and *Sgce*<sup>m+/pGt</sup> samples as a function of *p* value. Genes showing differential expression with *p* values < 0.05 are depicted with green dots. Other genes are represented with gray dots. Red dots represent genes with > 2X up-regulation (*p* < 0.05) and blue dots represent genes with > 2X down-regulation (*p* < 0.05).

**Video S1**

“Tiptoe” walking in a female P16 *Sgce*<sup>m+/pGt</sup> mouse

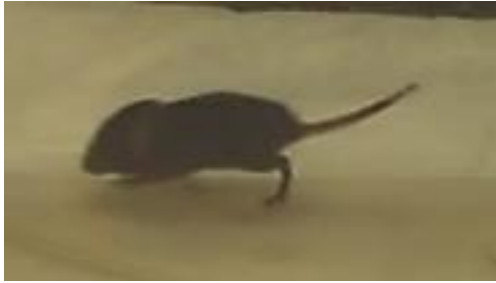

**Video S2**

Sustained hindlimb flexion posturing in response to hindlimb displacement in a male P14 *Sgce*<sup>m+/pGt</sup> mouse

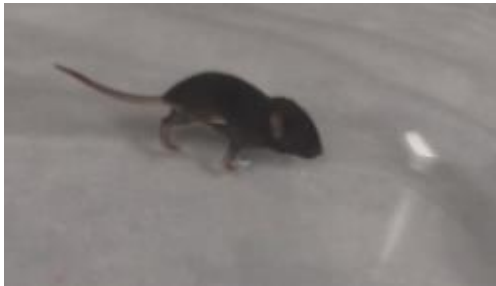

Supplement: NIHMS837194-supplement-1.pdf [file NIHMS837194-supplement-1.pdf]
